# Supplementary material
Source: PubMed Central journal article supplement (PMC4382102)

A

LNCaP

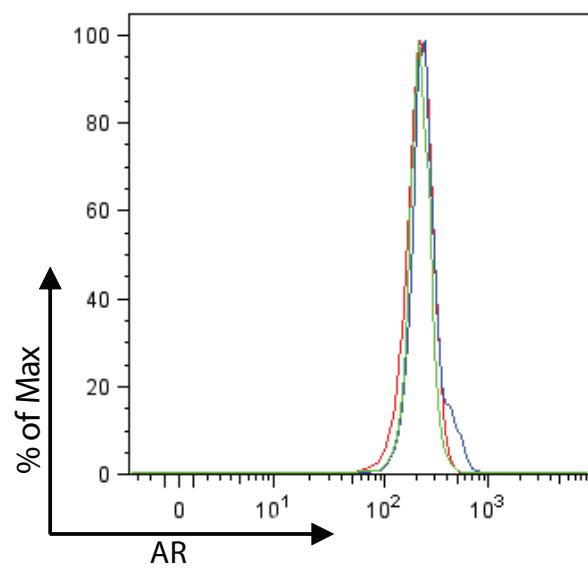

B

C42

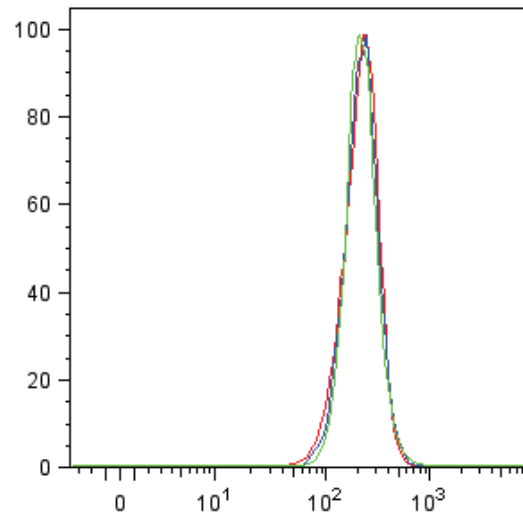

G1  
S - phase  
G2M

C

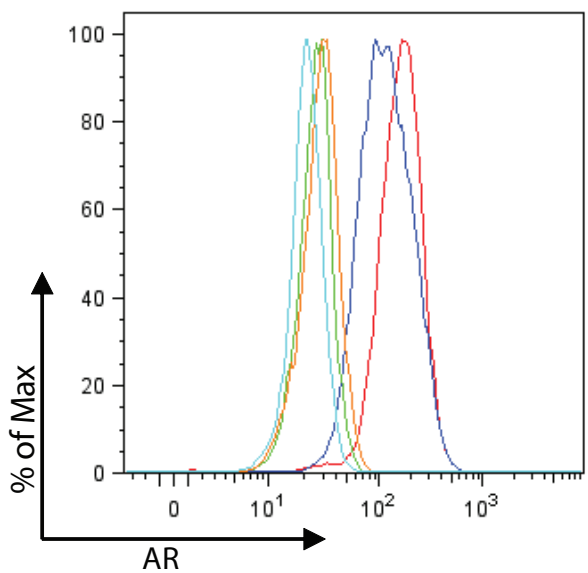

D

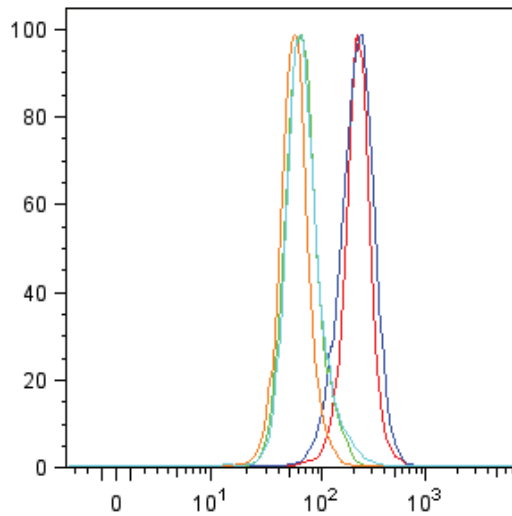

LNCaP  
C42  
PC3  
LHS  
COS7

Supplement: NIHMS666552-supplement-1.pdf [file NIHMS666552-supplement-1.pdf]

**A**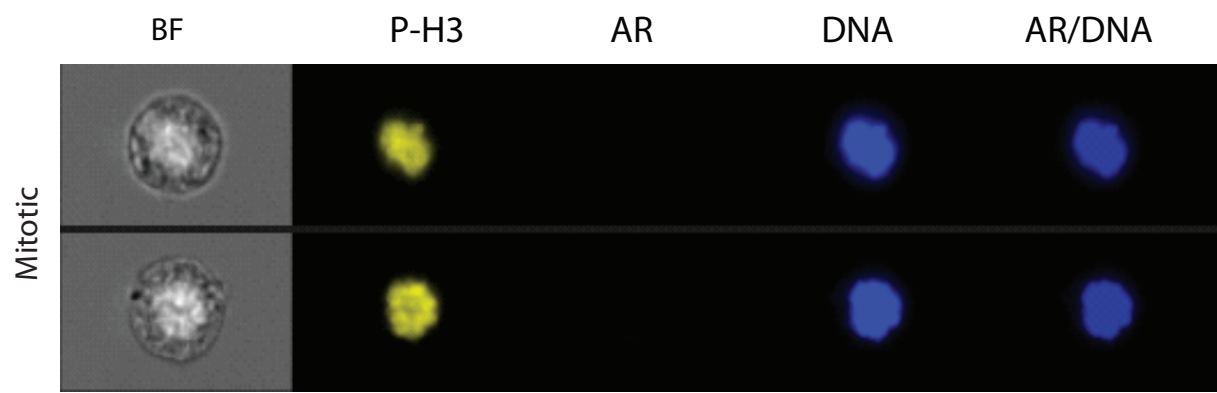**B**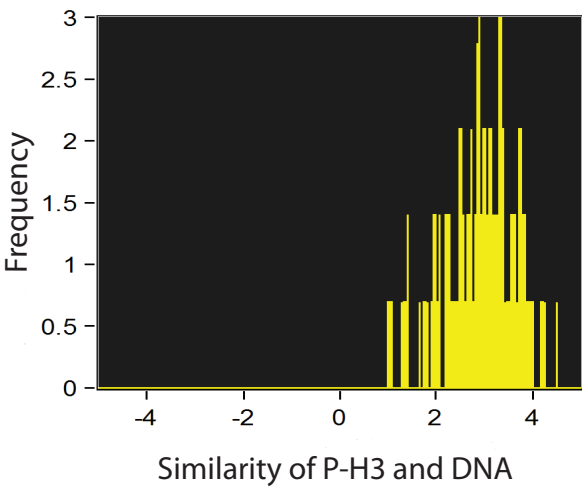**C**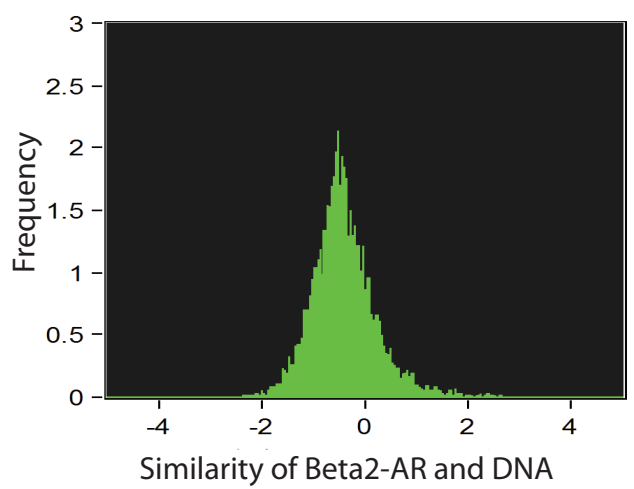**D**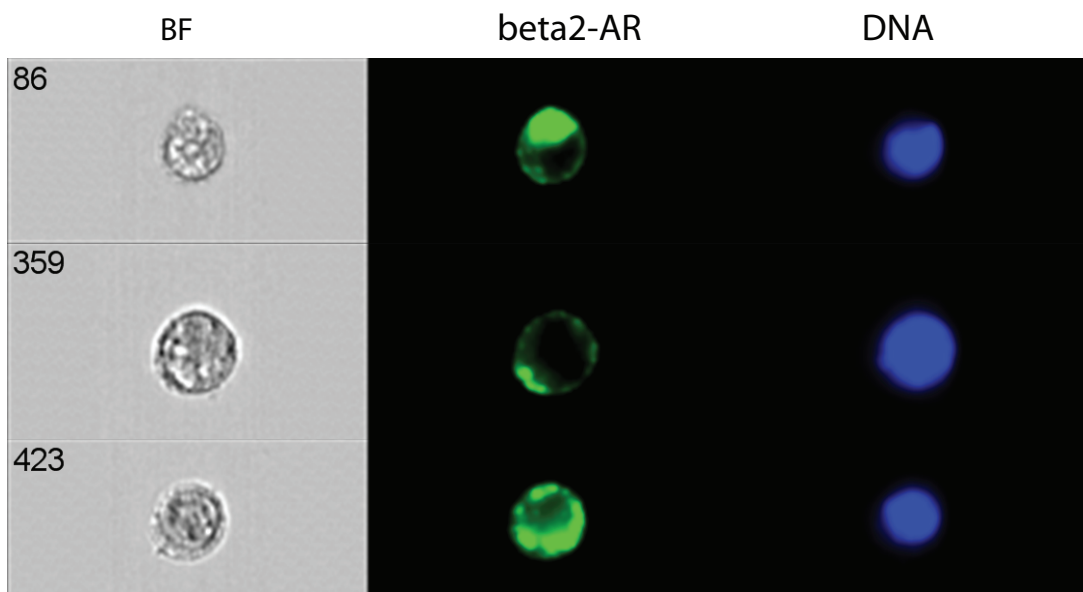

Supplement: NIHMS666552-supplement-2.pdf [file NIHMS666552-supplement-2.pdf]

LNCaP

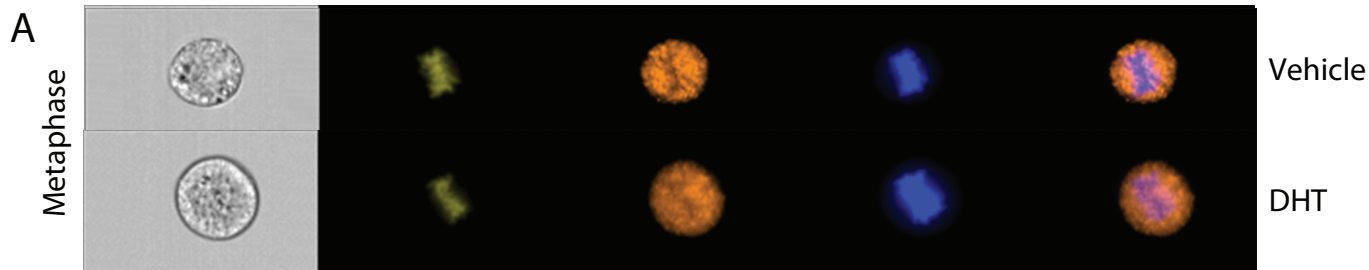

C42

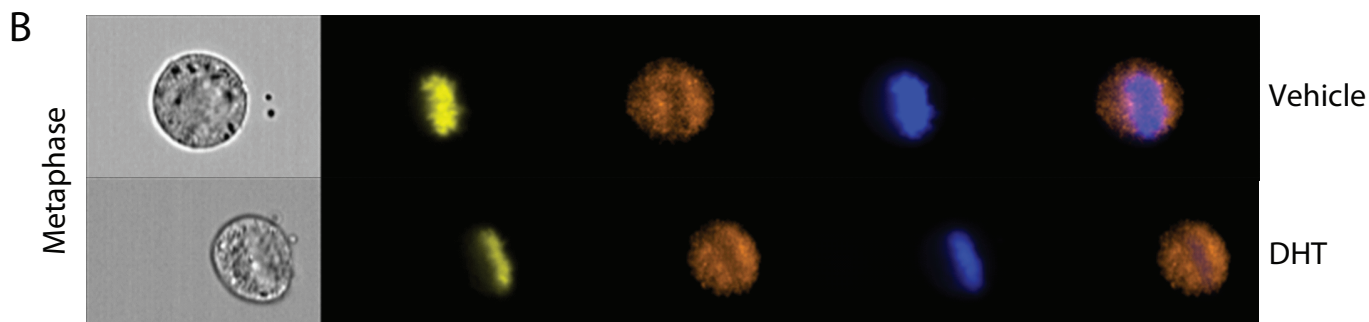

Supplement: NIHMS666552-supplement-3.pdf [file NIHMS666552-supplement-3.pdf]

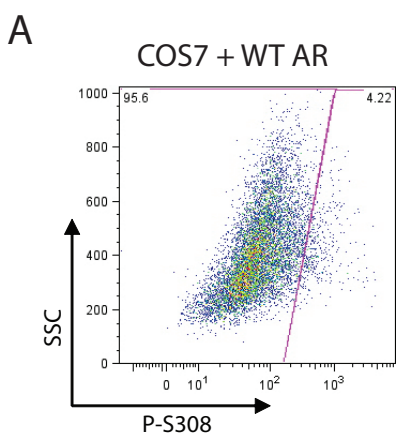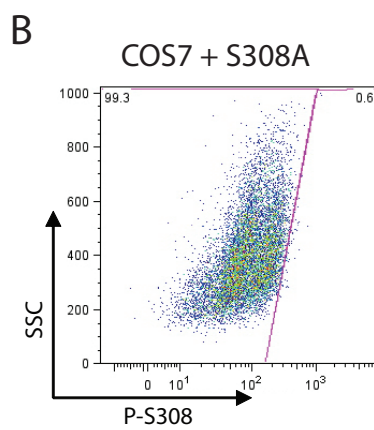

**C**

|       | Total AR (Flag)-positive, % | p308 positive cells from total AR positive pool, % |
|-------|-----------------------------|----------------------------------------------------|
| WTAR  | 21.5 ± 1.6                  | 4.2 ± 0.05                                         |
| S308A | 22.6 ± 1.0                  | 0.5 ± 0.18                                         |

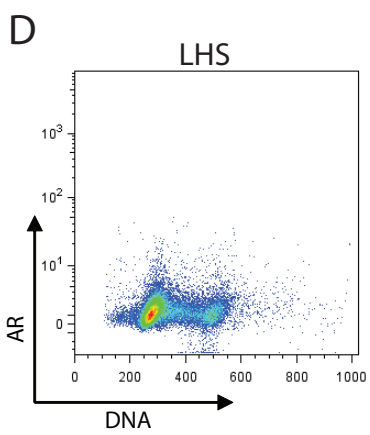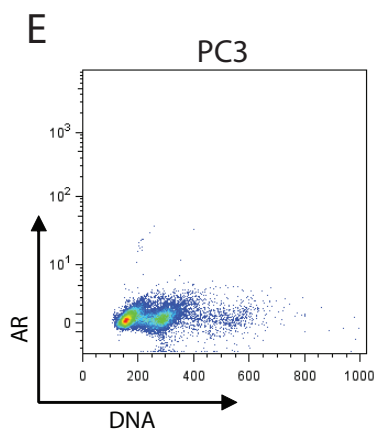

Supplement: NIHMS666552-supplement-4.pdf [file NIHMS666552-supplement-4.pdf]

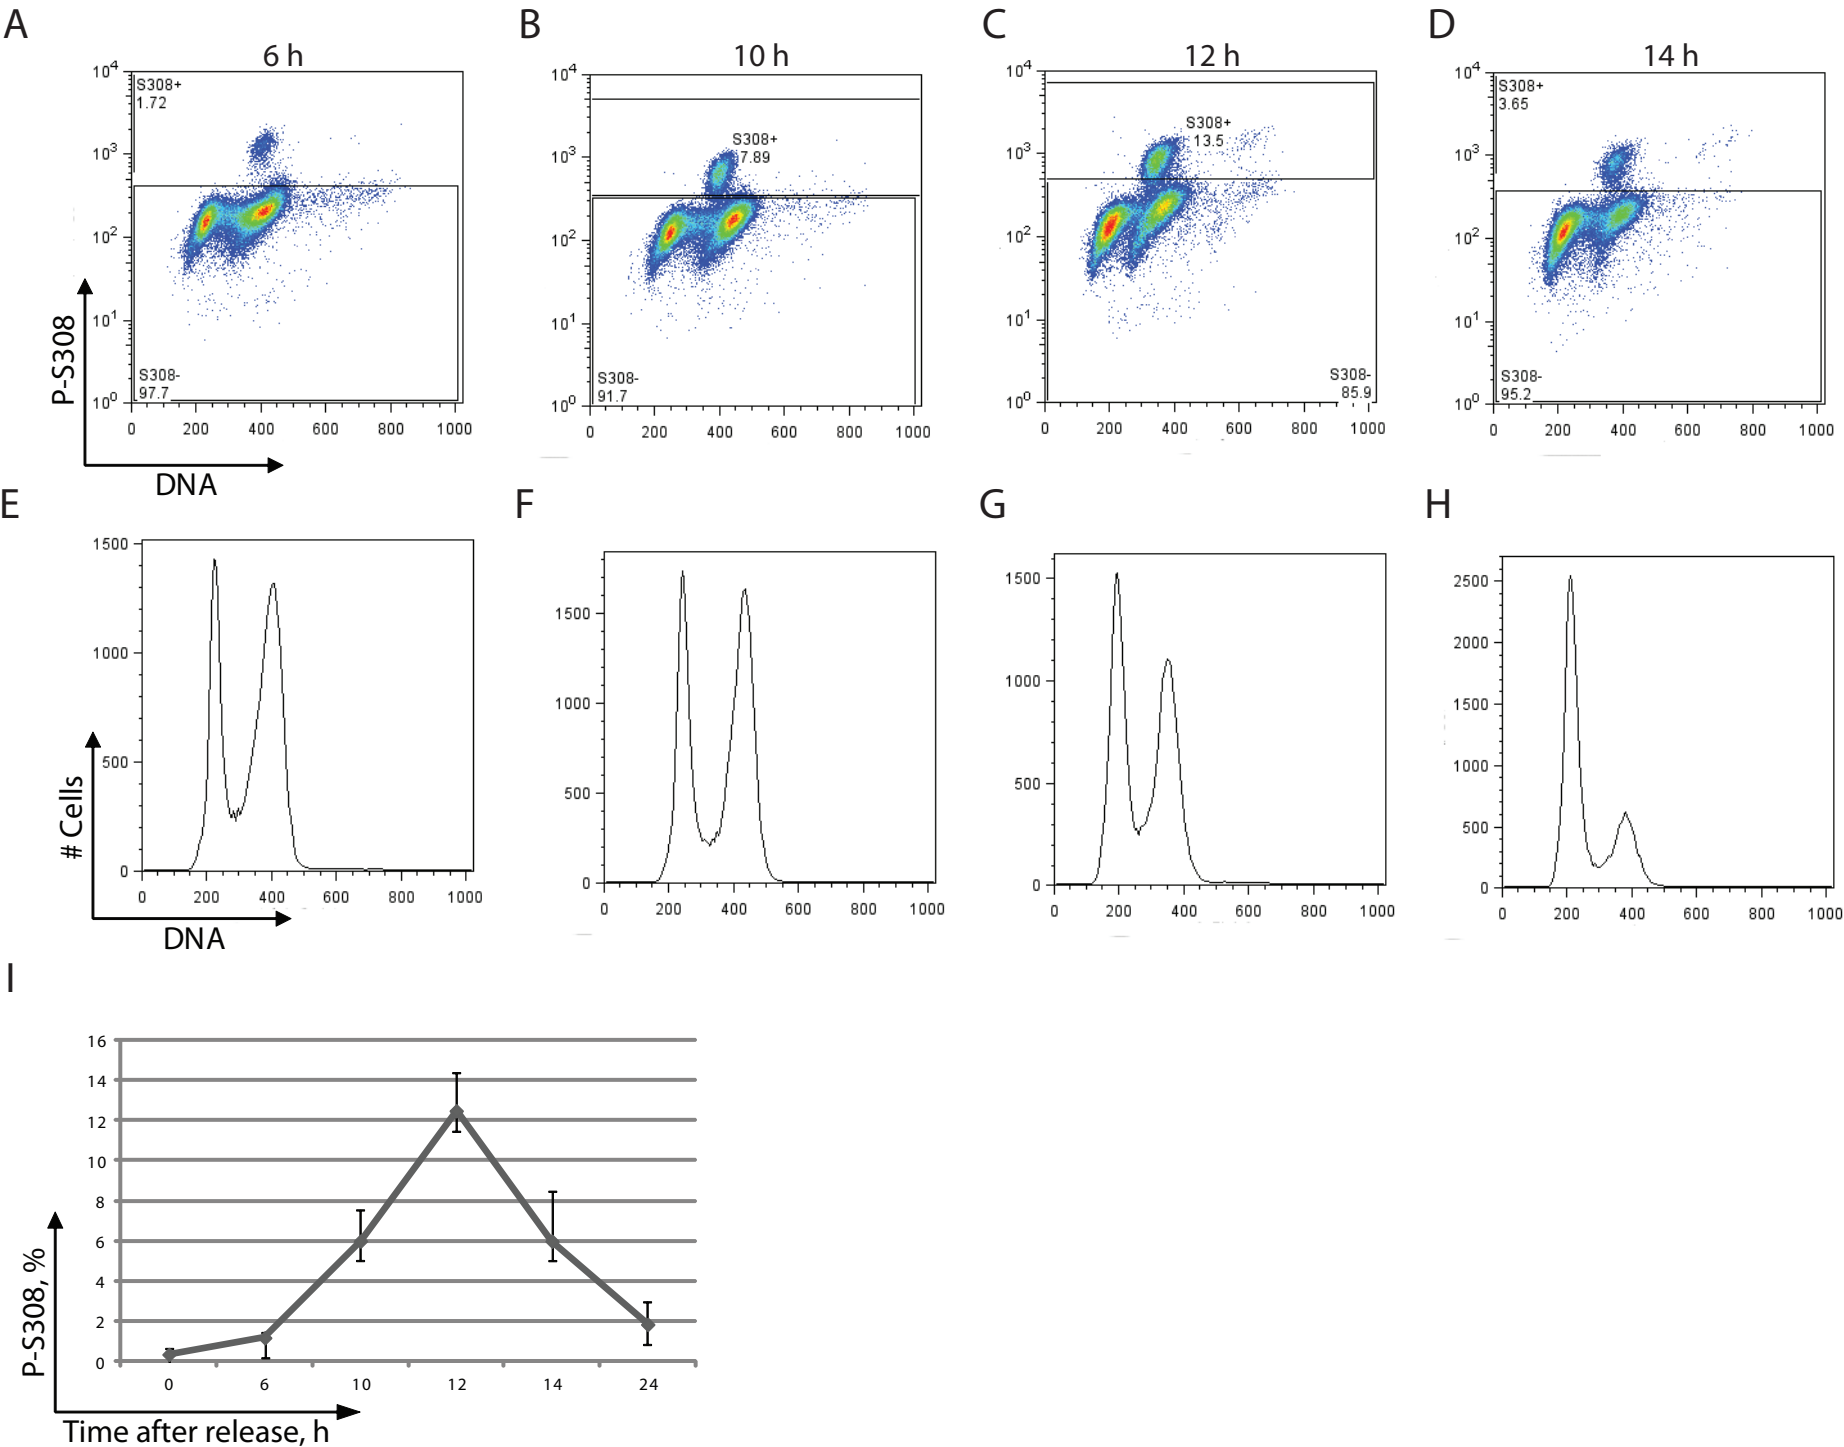

Supplemental Figure 5

Supplement: NIHMS666552-supplement-5.pdf [file NIHMS666552-supplement-5.pdf]

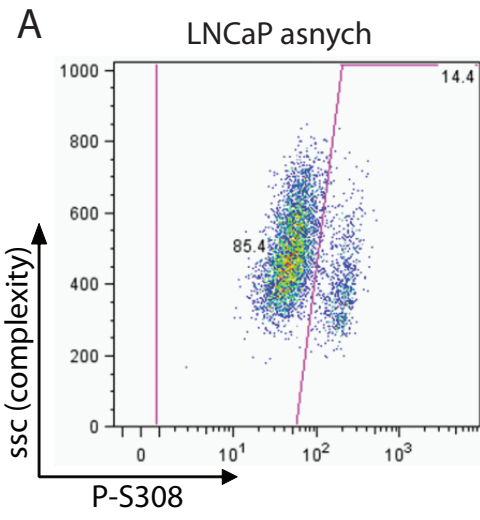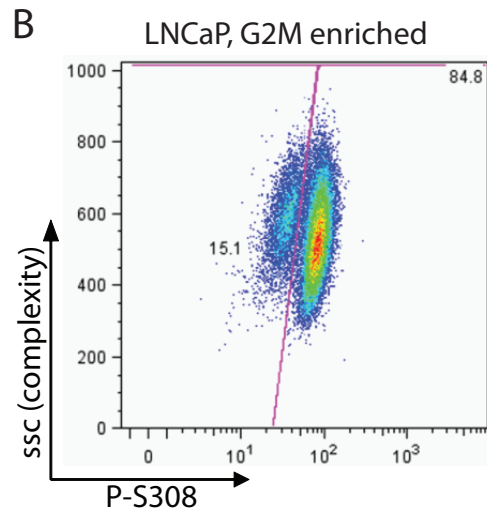

Supplement: NIHMS666552-supplement-6.pdf [file NIHMS666552-supplement-6.pdf]

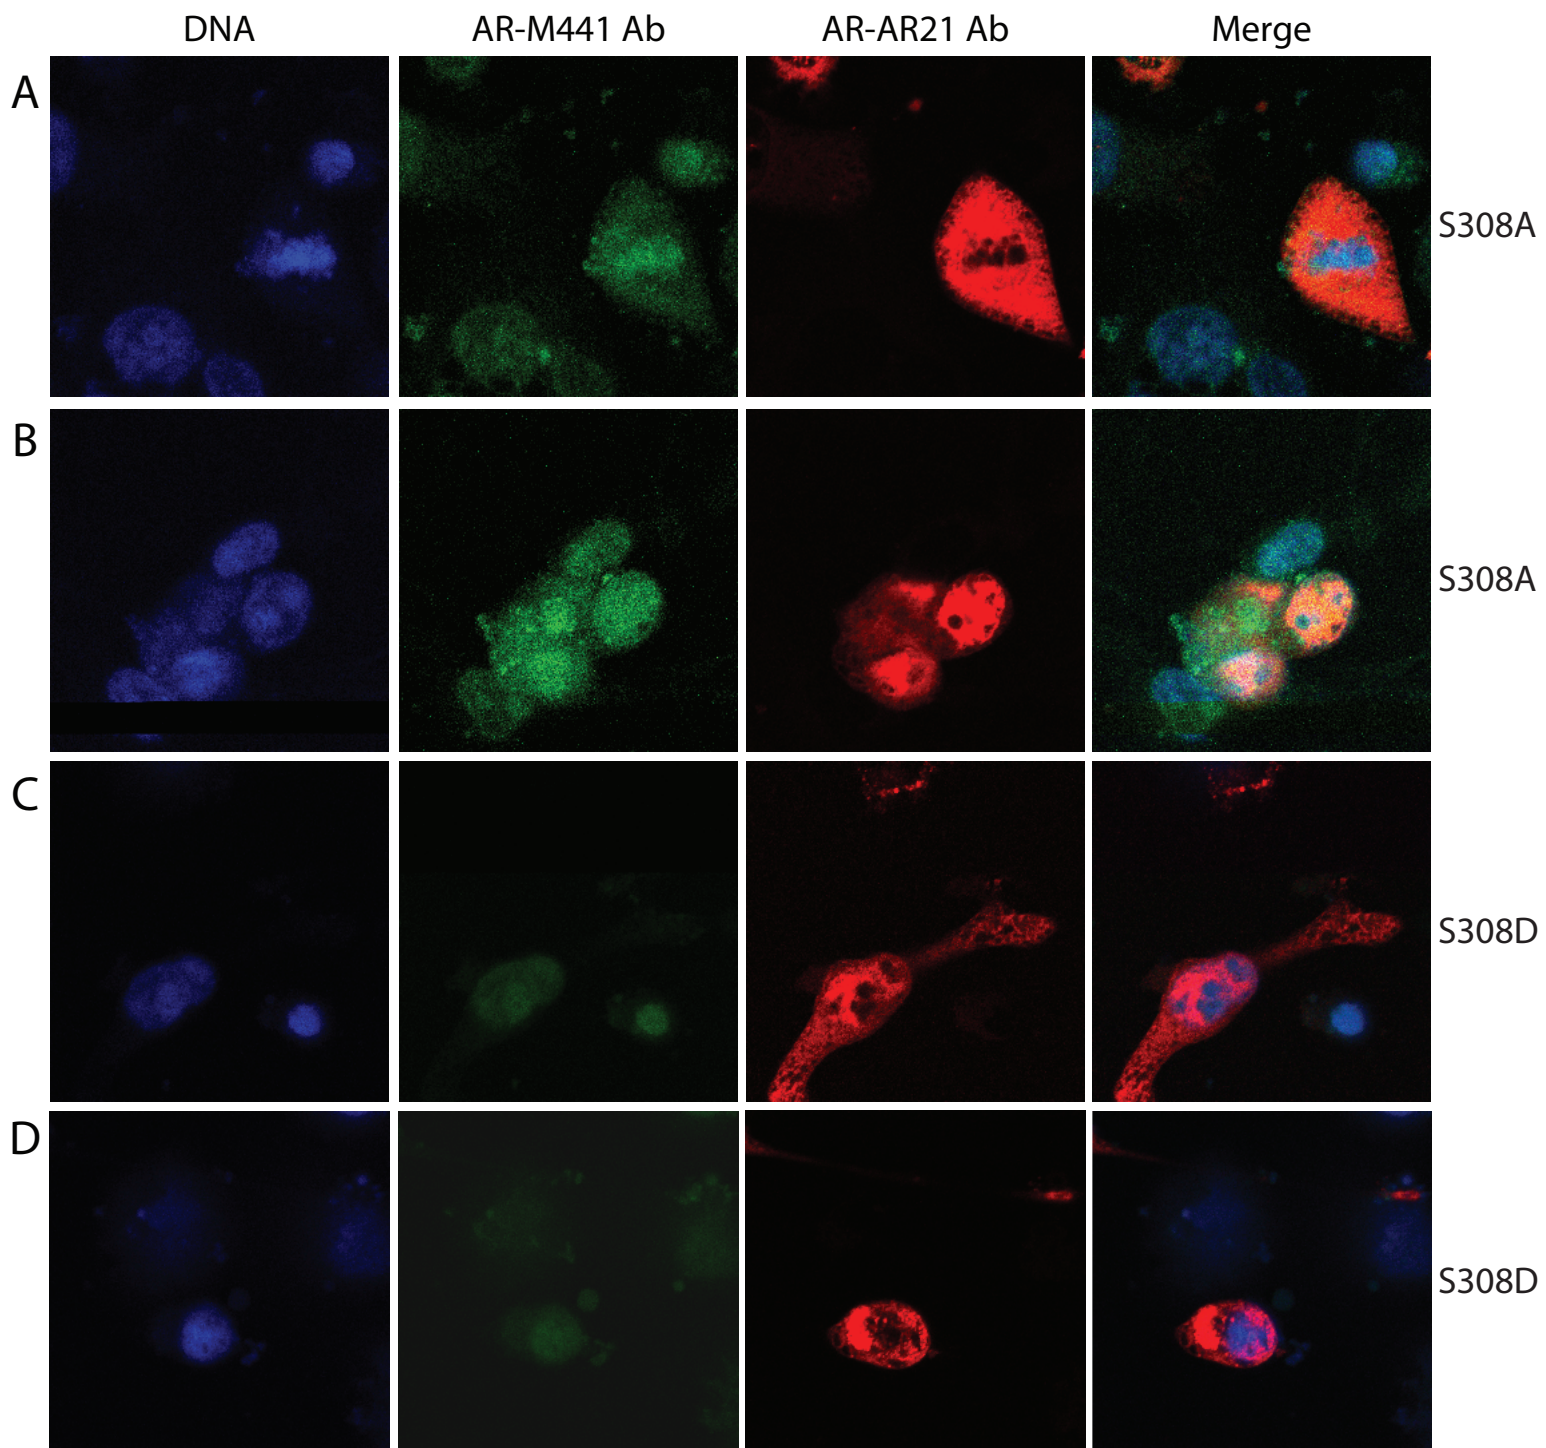

Supplement: NIHMS666552-supplement-7.pdf [file NIHMS666552-supplement-7.pdf]

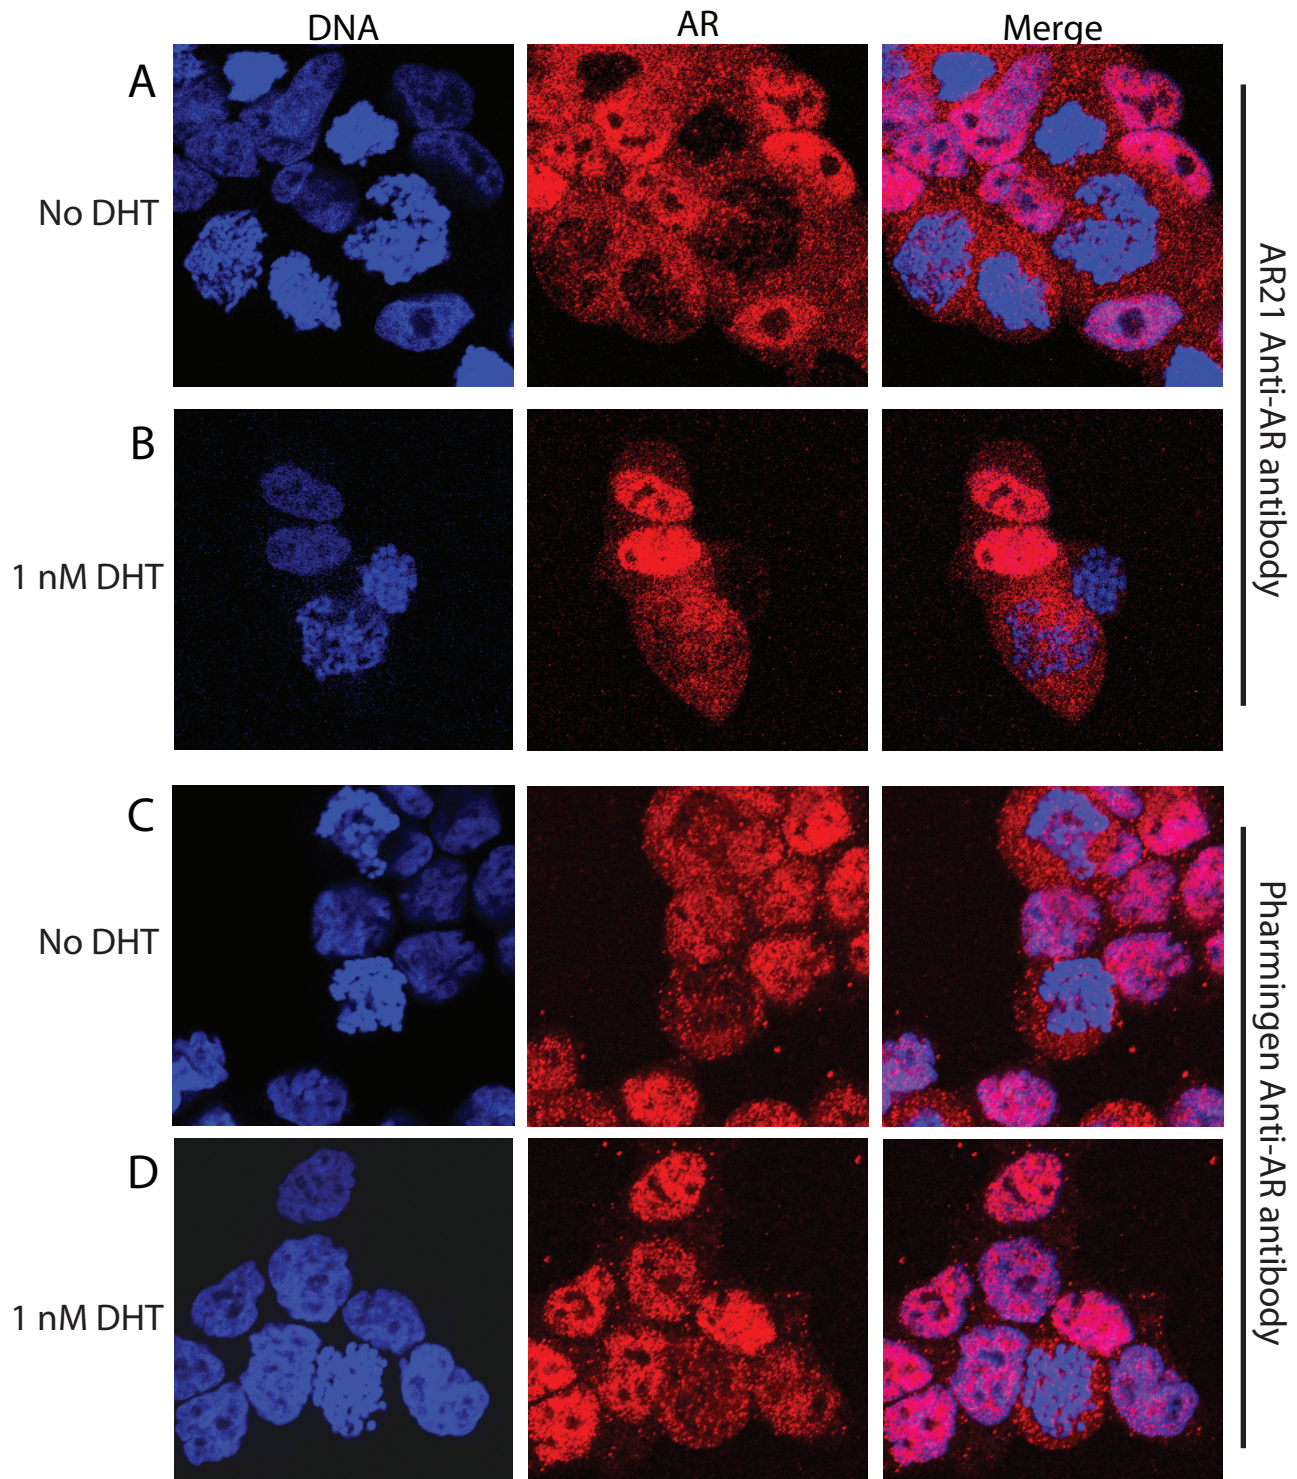

Supplement: NIHMS666552-supplement-8.pdf [file NIHMS666552-supplement-8.pdf]
